# Supplementary material for: Environmental sustainability in the operating room: A worldwide survey among anaesthesiologists
Source: PubMed Central journal article supplement (PMC11783648; doi:10.1097/ea9.0000000000000025), 2023-06-09
Supplement: ejaic-2-e0025-s011.pdf [file ejaic-2-e0025-s011.pdf]

**Table 1S: CO2 emissions (metric tons per capita) from World Development Bank**

| Country Name           | Indicator Name                         | 2018        | QUINTILE |
|------------------------|----------------------------------------|-------------|----------|
| United Arab Emirates   | CO2 emissions (metric tons per capita) | 20,7974984  | 1        |
| Canada                 | CO2 emissions (metric tons per capita) | 15,49702527 | 1        |
| Australia              | CO2 emissions (metric tons per capita) | 15,47551649 | 1        |
| Saudi Arabia           | CO2 emissions (metric tons per capita) | 15,26878053 | 1        |
| United States          | CO2 emissions (metric tons per capita) | 15,24087458 | 1        |
| Oman                   | CO2 emissions (metric tons per capita) | 15,19212436 | 1        |
| Korea, Rep.            | CO2 emissions (metric tons per capita) | 12,22459136 | 1        |
| Estonia                | CO2 emissions (metric tons per capita) | 12,103085   | 1        |
| Russian Federation     | CO2 emissions (metric tons per capita) | 11,12661837 | 1        |
| Czech Republic         | CO2 emissions (metric tons per capita) | 9,640704998 | 1        |
| Netherlands            | CO2 emissions (metric tons per capita) | 8,772823734 | 1        |
| Japan                  | CO2 emissions (metric tons per capita) | 8,74225771  | 1        |
| Germany                | CO2 emissions (metric tons per capita) | 8,558389812 | 1        |
| Poland                 | CO2 emissions (metric tons per capita) | 8,235472255 | 1        |
| Belgium                | CO2 emissions (metric tons per capita) | 8,179711061 | 1        |
| Finland                | CO2 emissions (metric tons per capita) | 8,04275205  | 2        |
| Ireland                | CO2 emissions (metric tons per capita) | 7,624325193 | 2        |
| South Africa           | CO2 emissions (metric tons per capita) | 7,496644895 | 2        |
| Austria                | CO2 emissions (metric tons per capita) | 7,146637625 | 2        |
| Norway                 | CO2 emissions (metric tons per capita) | 7,031361189 | 2        |
| Israel                 | CO2 emissions (metric tons per capita) | 6,976403837 | 2        |
| Bosnia and Herzegovina | CO2 emissions (metric tons per capita) | 6,781131607 | 2        |
| Slovenia               | CO2 emissions (metric tons per capita) | 6,774695332 | 2        |
| New Zealand            | CO2 emissions (metric tons per capita) | 6,572664572 | 2        |
| Serbia                 | CO2 emissions (metric tons per         | 6,521922194 | 2        |

|                 |                                                   |             |   |
|-----------------|---------------------------------------------------|-------------|---|
| Iceland         | capita)<br>CO2 emissions (metric tons per capita) | 6,237224322 | 2 |
| Greece          | CO2 emissions (metric tons per capita)            | 6,08317505  | 2 |
| Cyprus          | CO2 emissions (metric tons per capita)            | 6,079400502 | 2 |
| Slovak Republic | CO2 emissions (metric tons per capita)            | 6,058635474 | 2 |
| Bulgaria        | CO2 emissions (metric tons per capita)            | 5,854773434 | 2 |
| Denmark         | CO2 emissions (metric tons per capita)            | 5,761494164 | 3 |
| Spain           | CO2 emissions (metric tons per capita)            | 5,5203504   | 3 |
| United Kingdom  | CO2 emissions (metric tons per capita)            | 5,398708138 | 3 |
| Italy           | CO2 emissions (metric tons per capita)            | 5,376374339 | 3 |
| Turkey          | CO2 emissions (metric tons per capita)            | 5,01541837  | 3 |
| Portugal        | CO2 emissions (metric tons per capita)            | 4,840612761 | 3 |
| Hungary         | CO2 emissions (metric tons per capita)            | 4,745506244 | 3 |
| Chile           | CO2 emissions (metric tons per capita)            | 4,624872245 | 3 |
| France          | CO2 emissions (metric tons per capita)            | 4,619241205 | 3 |
| Switzerland     | CO2 emissions (metric tons per capita)            | 4,401991044 | 3 |
| Ukraine         | CO2 emissions (metric tons per capita)            | 4,154180631 | 3 |
| Lithuania       | CO2 emissions (metric tons per capita)            | 4,137005929 | 3 |
| Croatia         | CO2 emissions (metric tons per capita)            | 4,055928762 | 3 |
| Montenegro      | CO2 emissions (metric tons per capita)            | 4,049968902 | 3 |
| Lebanon         | CO2 emissions (metric tons per capita)            | 4,039707217 | 3 |
| Argentina       | CO2 emissions (metric tons per capita)            | 3,987234198 | 4 |
| Latvia          | CO2 emissions (metric tons per capita)            | 3,959165078 | 4 |
| Romania         | CO2 emissions (metric tons per capita)            | 3,845132759 | 4 |
| Mexico          | CO2 emissions (metric tons per capita)            | 3,741477725 | 4 |
| North Macedonia | CO2 emissions (metric tons per capita)            | 3,549725294 | 4 |

|                  |                                        |             |   |
|------------------|----------------------------------------|-------------|---|
| Sweden           | CO2 emissions (metric tons per capita) | 3,538009127 | 4 |
| Malta            | CO2 emissions (metric tons per capita) | 3,198316241 | 4 |
| Moldova          | CO2 emissions (metric tons per capita) | 3,171832063 | 4 |
| Georgia          | CO2 emissions (metric tons per capita) | 2,538541691 | 4 |
| Egypt, Arab Rep. | CO2 emissions (metric tons per capita) | 2,502042142 | 4 |
| Panama           | CO2 emissions (metric tons per capita) | 2,42765632  | 4 |
| Ecuador          | CO2 emissions (metric tons per capita) | 2,3138123   | 4 |
| Brazil           | CO2 emissions (metric tons per capita) | 2,041874199 | 4 |
| Bolivia          | CO2 emissions (metric tons per capita) | 2,000327663 | 4 |
| Albania          | CO2 emissions (metric tons per capita) | 1,939731563 | 4 |
| Uruguay          | CO2 emissions (metric tons per capita) | 1,890244079 | 5 |
| Armenia          | CO2 emissions (metric tons per capita) | 1,880246268 | 5 |
| India            | CO2 emissions (metric tons per capita) | 1,799825446 | 5 |
| Peru             | CO2 emissions (metric tons per capita) | 1,69681923  | 5 |
| Colombia         | CO2 emissions (metric tons per capita) | 1,600650618 | 5 |
| Paraguay         | CO2 emissions (metric tons per capita) | 1,210453778 | 5 |
| Honduras         | CO2 emissions (metric tons per capita) | 1,019032757 | 5 |
| Pakistan         | CO2 emissions (metric tons per capita) | 0,981820105 | 5 |
| Nigeria          | CO2 emissions (metric tons per capita) | 0,667110199 | 5 |
| Ghana            | CO2 emissions (metric tons per capita) | 0,541201382 | 5 |
| Kenya            | CO2 emissions (metric tons per capita) | 0,358028408 | 5 |
| Ethiopia         | CO2 emissions (metric tons per capita) | 0,149050931 | 5 |
| Uganda           | CO2 emissions (metric tons per capita) | 0,143462178 | 5 |
| Rwanda           | CO2 emissions (metric tons per capita) | 0,087790824 | 5 |
| Kosovo           | CO2 emissions (metric tons per capita) |             | 5 |

Countries are aggrouped into quintiles in order to make comparisons among equivalent groups of countries with similar CO2 emissions.

Data source: The World Bank Database

<https://data.worldbank.org/indicator/EN.ATM.CO2E.PC>

**Table 2S: GDP per capita expressed in current US dollars. Data from World Development Bank**

| Country Name         | Indicator Name                | 2020        | QUINTILE |
|----------------------|-------------------------------|-------------|----------|
| Switzerland          | GDP per capita (current US\$) | 87100,41482 | 1        |
| Ireland              | GDP per capita (current US\$) | 85422,54287 | 1        |
| Norway               | GDP per capita (current US\$) | 67329,67779 | 1        |
| United States        | GDP per capita (current US\$) | 63206,52108 | 1        |
| Denmark              | GDP per capita (current US\$) | 61063,31643 | 1        |
| Iceland              | GDP per capita (current US\$) | 59264,03409 | 1        |
| Netherlands          | GDP per capita (current US\$) | 52396,03221 | 1        |
| Sweden               | GDP per capita (current US\$) | 52274,40879 | 1        |
| Australia            | GDP per capita (current US\$) | 51680,31652 | 1        |
| Finland              | GDP per capita (current US\$) | 48755,35501 | 1        |
| Austria              | GDP per capita (current US\$) | 48588,65938 | 1        |
| Germany              | GDP per capita (current US\$) | 46252,6893  | 1        |
| Belgium              | GDP per capita (current US\$) | 45205,33594 | 1        |
| Israel               | GDP per capita (current US\$) | 44177,57122 | 1        |
| Canada               | GDP per capita (current US\$) | 43258,26387 | 1        |
| New Zealand          | GDP per capita (current US\$) | 41441,46667 | 2        |
| United Kingdom       | GDP per capita (current US\$) | 41059,16881 | 2        |
| Japan                | GDP per capita (current US\$) | 40193,25244 | 2        |
| France               | GDP per capita (current US\$) | 39037,12263 | 2        |
| United Arab Emirates | GDP per capita (current US\$) | 36284,55524 | 2        |
| Italy                | GDP per capita (current US\$) | 31769,96587 | 2        |
| Korea, Rep.          | GDP per capita (current US\$) | 31597,50465 | 2        |
| Malta                | GDP per capita (current US\$) | 28423,2002  | 2        |
| Cyprus               | GDP per capita (current US\$) | 27527,84531 | 2        |

|                    |                               |             |   |
|--------------------|-------------------------------|-------------|---|
|                    | US\$)                         |             |   |
| Spain              | GDP per capita (current US\$) | 27056,42175 | 2 |
| Slovenia           | GDP per capita (current US\$) | 25489,50023 | 2 |
| Estonia            | GDP per capita (current US\$) | 23054,35849 | 2 |
| Czech Republic     | GDP per capita (current US\$) | 22933,49959 | 2 |
| Portugal           | GDP per capita (current US\$) | 22194,56611 | 2 |
| Lithuania          | GDP per capita (current US\$) | 20232,30204 | 2 |
| Saudi Arabia       | GDP per capita (current US\$) | 20110,31619 | 3 |
| Slovak Republic    | GDP per capita (current US\$) | 19266,51357 | 3 |
| Latvia             | GDP per capita (current US\$) | 17736,50375 | 3 |
| Greece             | GDP per capita (current US\$) | 17647,23269 | 3 |
| Hungary            | GDP per capita (current US\$) | 15980,10823 | 3 |
| Poland             | GDP per capita (current US\$) | 15742,45373 | 3 |
| Uruguay            | GDP per capita (current US\$) | 15438,41167 | 3 |
| Oman               | GDP per capita (current US\$) | 14485,38612 | 3 |
| Croatia            | GDP per capita (current US\$) | 14132,48656 | 3 |
| Chile              | GDP per capita (current US\$) | 13231,70421 | 3 |
| Romania            | GDP per capita (current US\$) | 12915,24305 | 3 |
| Panama             | GDP per capita (current US\$) | 12509,83529 | 3 |
| Russian Federation | GDP per capita (current US\$) | 10126,72179 | 3 |
| Bulgaria           | GDP per capita (current US\$) | 10079,20338 | 3 |
| Argentina          | GDP per capita (current US\$) | 8579,017773 | 3 |
| Turkey             | GDP per capita (current US\$) | 8536,43332  | 4 |
| Mexico             | GDP per capita (current US\$) | 8329,271313 | 4 |
| Serbia             | GDP per capita (current US\$) | 7730,691746 | 4 |
| Montenegro         | GDP per capita (current US\$) | 7677,152226 | 4 |

|                        |                               |             |   |
|------------------------|-------------------------------|-------------|---|
| Brazil                 | GDP per capita (current US\$) | 6796,844542 | 4 |
| Peru                   | GDP per capita (current US\$) | 6126,87454  | 4 |
| Bosnia and Herzegovina | GDP per capita (current US\$) | 6079,738285 | 4 |
| North Macedonia        | GDP per capita (current US\$) | 5917,262575 | 4 |
| South Africa           | GDP per capita (current US\$) | 5655,867654 | 4 |
| Ecuador                | GDP per capita (current US\$) | 5600,389615 | 4 |
| Colombia               | GDP per capita (current US\$) | 5334,556042 | 4 |
| Albania                | GDP per capita (current US\$) | 5246,096346 | 4 |
| Paraguay               | GDP per capita (current US\$) | 5001,07276  | 4 |
| Lebanon                | GDP per capita (current US\$) | 4649,547646 | 4 |
| Moldova                | GDP per capita (current US\$) | 4547,059721 | 4 |
| Kosovo                 | GDP per capita (current US\$) | 4310,811183 | 5 |
| Armenia                | GDP per capita (current US\$) | 4266,018074 | 5 |
| Georgia                | GDP per capita (current US\$) | 4256,701186 | 5 |
| Ukraine                | GDP per capita (current US\$) | 3724,938437 | 5 |
| Egypt, Arab Rep.       | GDP per capita (current US\$) | 3569,206841 | 5 |
| Bolivia                | GDP per capita (current US\$) | 3133,099803 | 5 |
| Honduras               | GDP per capita (current US\$) | 2389,012431 | 5 |
| Ghana                  | GDP per capita (current US\$) | 2205,529016 | 5 |
| Nigeria                | GDP per capita (current US\$) | 2097,092473 | 5 |
| India                  | GDP per capita (current US\$) | 1927,707823 | 5 |
| Kenya                  | GDP per capita (current US\$) | 1878,580703 | 5 |
| Pakistan               | GDP per capita (current US\$) | 1188,859757 | 5 |
| Ethiopia               | GDP per capita (current US\$) | 936,3404611 | 5 |
| Uganda                 | GDP per capita (current US\$) | 822,0276815 | 5 |
| Rwanda                 | GDP per capita (current US\$) | 797,8555207 | 5 |

|  |       |  |  |
|--|-------|--|--|
|  | US\$) |  |  |
|--|-------|--|--|

Countries are aggrouped into quintiles in order to make comparisons among equivalent groups of countries with similar GDP *per capita*.

Data source: The World Bank Database

<https://data.worldbank.org/indicator/NY.GDP.PCAP.CD>



**Table 3S: Health Expenditure expressed as percentage of GDP**

| Country Name   | Indicator Name                        | 2019        | QUINTILE |
|----------------|---------------------------------------|-------------|----------|
| United States  | Current health expenditure (% of GDP) | 16,76706314 | 1        |
| Germany        | Current health expenditure (% of GDP) | 11,69724941 | 1        |
| Armenia        | Current health expenditure (% of GDP) | 11,33526421 | 1        |
| Switzerland    | Current health expenditure (% of GDP) | 11,29148102 | 1        |
| France         | Current health expenditure (% of GDP) | 11,05747223 | 1        |
| Sweden         | Current health expenditure (% of GDP) | 10,86749268 | 1        |
| Canada         | Current health expenditure (% of GDP) | 10,84447765 | 1        |
| Japan          | Current health expenditure (% of GDP) | 10,74372482 | 1        |
| Belgium        | Current health expenditure (% of GDP) | 10,65604973 | 1        |
| Norway         | Current health expenditure (% of GDP) | 10,52134705 | 1        |
| Austria        | Current health expenditure (% of GDP) | 10,43403149 | 1        |
| United Kingdom | Current health expenditure (% of GDP) | 10,15402699 | 1        |
| Netherlands    | Current health expenditure (% of GDP) | 10,13031101 | 1        |
| Denmark        | Current health expenditure (% of GDP) | 9,95583057  | 1        |
| Australia      | Current health expenditure (% of GDP) | 9,91078568  | 1        |
| New Zealand    | Current health expenditure (% of GDP) | 9,74117661  | 2        |
| Brazil         | Current health expenditure (% of GDP) | 9,5912714   | 2        |
| Portugal       | Current health expenditure (% of GDP) | 9,53145981  | 2        |
| Argentina      | Current health expenditure (% of GDP) | 9,5100708   | 2        |
| Uruguay        | Current health expenditure (% of GDP) | 9,34783173  | 2        |
| Chile          | Current health expenditure (% of GDP) | 9,33272362  | 2        |
| Finland        | Current health expenditure (% of GDP) | 9,15348339  | 2        |
| Spain          | Current health expenditure (% of GDP) | 9,13213158  | 2        |
| South Africa   | Current health expenditure (% of GDP) | 9,10935497  | 2        |

|                        |                                       |            |   |
|------------------------|---------------------------------------|------------|---|
| Bosnia and Herzegovina | Current health expenditure (% of GDP) | 9,04909897 | 2 |
| Serbia                 | Current health expenditure (% of GDP) | 8,67206478 | 2 |
| Italy                  | Current health expenditure (% of GDP) | 8,66856861 | 2 |
| Lebanon                | Current health expenditure (% of GDP) | 8,64661503 | 2 |
| Iceland                | Current health expenditure (% of GDP) | 8,63868046 | 2 |
| Slovenia               | Current health expenditure (% of GDP) | 8,52386475 | 2 |
| Montenegro             | Current health expenditure (% of GDP) | 8,32983208 | 3 |
| Malta                  | Current health expenditure (% of GDP) | 8,21444321 | 3 |
| Korea, Rep.            | Current health expenditure (% of GDP) | 8,1641655  | 3 |
| Greece                 | Current health expenditure (% of GDP) | 7,83788586 | 3 |
| Czech Republic         | Current health expenditure (% of GDP) | 7,83470726 | 3 |
| Ecuador                | Current health expenditure (% of GDP) | 7,81824684 | 3 |
| Colombia               | Current health expenditure (% of GDP) | 7,70943594 | 3 |
| Panama                 | Current health expenditure (% of GDP) | 7,58405781 | 3 |
| Israel                 | Current health expenditure (% of GDP) | 7,46131897 | 3 |
| Honduras               | Current health expenditure (% of GDP) | 7,2839179  | 3 |
| North Macedonia        | Current health expenditure (% of GDP) | 7,25409985 | 3 |
| Paraguay               | Current health expenditure (% of GDP) | 7,17281008 | 3 |
| Bulgaria               | Current health expenditure (% of GDP) | 7,12611389 | 3 |
| Ukraine                | Current health expenditure (% of GDP) | 7,09860182 | 3 |
| Cyprus                 | Current health expenditure (% of GDP) | 7,00903225 | 3 |
| Lithuania              | Current health expenditure (% of GDP) | 7,00600433 | 4 |
| Croatia                | Current health expenditure (% of GDP) | 6,97861767 | 4 |
| Slovak Republic        | Current health expenditure (% of GDP) | 6,9586463  | 4 |
| Bolivia                | Current health expenditure (% of GDP) | 6,9233799  | 4 |
| Estonia                | Current health expenditure (% of GDP) | 6,7304492  | 4 |

|                                                               |                                       |            |   |
|---------------------------------------------------------------|---------------------------------------|------------|---|
|                                                               | expenditure (% of GDP)                |            |   |
| Ireland                                                       | Current health expenditure (% of GDP) | 6,67931509 | 4 |
| Georgia                                                       | Current health expenditure (% of GDP) | 6,65744257 | 4 |
| Latvia                                                        | Current health expenditure (% of GDP) | 6,57814217 | 4 |
| Poland                                                        | Current health expenditure (% of GDP) | 6,44682503 | 4 |
| Rwanda                                                        | Current health expenditure (% of GDP) | 6,41066742 | 4 |
| Moldova                                                       | Current health expenditure (% of GDP) | 6,3779459  | 4 |
| Hungary                                                       | Current health expenditure (% of GDP) | 6,35002232 | 4 |
| Romania                                                       | Current health expenditure (% of GDP) | 5,74447823 | 4 |
| Saudi Arabia                                                  | Current health expenditure (% of GDP) | 5,68828773 | 4 |
| Russian Federation                                            | Current health expenditure (% of GDP) | 5,64849138 | 4 |
| Mexico                                                        | Current health expenditure (% of GDP) | 5,43305254 | 5 |
| Peru                                                          | Current health expenditure (% of GDP) | 5,21506882 | 5 |
| Egypt, Arab Rep.                                              | Current health expenditure (% of GDP) | 4,73997355 | 5 |
| Kenya                                                         | Current health expenditure (% of GDP) | 4,59182692 | 5 |
| Turkey                                                        | Current health expenditure (% of GDP) | 4,34409809 | 5 |
| United Arab Emirates                                          | Current health expenditure (% of GDP) | 4,27504921 | 5 |
| Oman                                                          | Current health expenditure (% of GDP) | 4,07190228 | 5 |
| Uganda                                                        | Current health expenditure (% of GDP) | 3,82522416 | 5 |
| Kosovo (estimation from Eurostat: Public health expenditure)  | Current health expenditure (% of GDP) | 3,6        | 5 |
| Ghana                                                         | Current health expenditure (% of GDP) | 3,41858864 | 5 |
| Pakistan                                                      | Current health expenditure (% of GDP) | 3,37992716 | 5 |
| Ethiopia                                                      | Current health expenditure (% of GDP) | 3,23808599 | 5 |
| Albania (estimation from Eurostat: Public health expenditure) | Current health expenditure (% of GDP) | 3,2        | 5 |
| Nigeria                                                       | Current health expenditure (% of GDP) | 3,02666044 | 5 |
| India                                                         | Current health expenditure (% of GDP) | 3,0141468  | 5 |

Countries are aggrouped into quintiles in order to make comparisons among equivalent groups of countries with similar healthcare expenditure.

Data source: The World Bank Database

<https://data.worldbank.org/indicator/SH.XPD.CHEX.GD.ZS>
